# Supplementary material for: Construction of supramolecular helical nanofibers using renewable biomaterials: self-assembly of a cytidylic acid-appended bolaamphiphile in lemon juice
Source: Royal Society of Chemistry journal article supplement (doi:10.1039/c2cc17787k), 2012-01-01
Supplement: c2cc17787k.pdf [file c2cc17787k.pdf]

## Supporting Information

### **Construction of Supramolecular Helical Nanofibers Using Renewable Biomaterials: Self-Assembly of Cytidylic Acid-Appended Bolaamphiphile in Lemon Juice**

Rika Iwaura,\* Mayumi Ohnishi-Kameyama

National Food Research Institute, National Agriculture and Food Research Organization, 2-1-12 Kannondai, Tsukuba, Ibaraki, 305-8642 Japan

Tel: +81-29-838-7089, Fax: +81-29-838-7996

E-mail: riwaura@affrc.go.jp

## Materials

Cytidilic acid-appended bolaamphiphile was synthesized in a manner similar to that described in a previous report (R. Iwaura et al, *Small*, **2010**, *6*, 1131.). Oxalic, malonic, succinic, glutaric, adipic, pimelic, and citric acids were purchased from Tokyo Chemical Industry Co. (Tokyo, Japan) and used without further purification.  $^1\text{H}$  NMR was recorded on a Bruker Avance model 400 spectrometer (Bruker BioSpin; Billerica, MA).

## Preparation of self-assemblies

The pH of the aqueous solutions containing each di-carboxylic acid or citric acid were adjusted with aqueous solutions of 0.1 N NaOH. The final concentrations of the di-carboxylic acids and citric acid were  $2 \times 10^{-2}$  M to  $\sim 3 \times 10^{-2}$  M. One mg of C18C was added to aqueous solutions of the di-carboxylic acid or citric acid (100  $\mu\text{l}$ ), heated at 90 °C, sonicated for 60 min (Branson ultrasonicator model 1200), and gradually allowed to cool to room temperature. The final concentration of C18C was  $1 \times 10^{-2}$  M. The self-assemblies were kept at room temperature overnight and subjected to microscopic observations and spectroscopic measurements.

## ATR-FTIR spectroscopy

For the ATR-FTIR spectroscopic measurements, a Spectrum 100 (Perkin-Elmer Corp.) instrument with a  $4\text{-cm}^{-1}$  resolution at 20 °C was used. The binary self-assembly of C18C and CA was prepared as described above at pH 4.7. For comparison, we prepared

the single-component self-assembly of C18C in aqueous HCl at pH 4.7. All the samples were freeze-dried prior to the ATR-FTIR measurements.

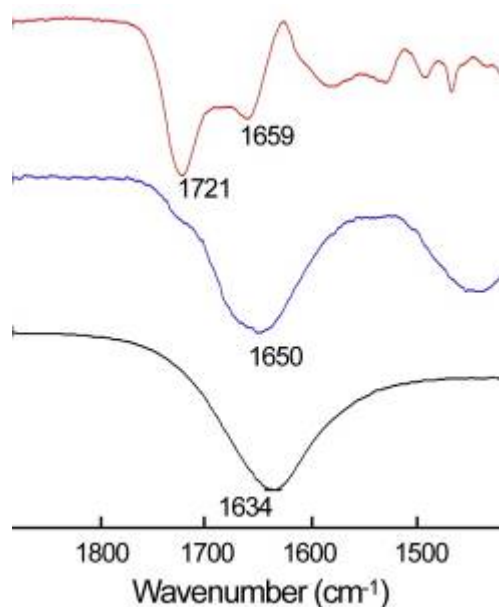

Figure S1 ATR-FTIR spectra for the freeze-dried binary self-assembly of C18C and CA (red), single-component of C18C (blue), and single-component CA (black).

### CD and UV-Vis spectroscopies

For CD spectroscopy, self-assemblies were diluted by a factor of 10 with Milli-Q water. CD spectra were measured using a Jasco J-810 spectropolarimeter operating between 200 and 400 nm (scan rate 1 nm/s, sensitivity 0.01°, cell length = 0.01 cm). The UV-Vis spectrum for the aqueous solution of C18C ( $1 \times 10^{-3}$  M) was recorded on a Shimadzu TMSPEC-8 spectrometer (cell length = 0.1 cm).

### AFM observations

One microliter of each aqueous solution was placed on highly oriented pyrolytic

graphite (HOPG) and dried at room temperature for 30 minutes. The specimen was washed with a little water, dried again overnight, and then subjected to AFM observation on an S-image (SII Nanotechnology Inc.) with a silicon-microcantilever (spring constant  $2 \text{ N m}^{-1}$ , Olympus) in a tapping mode.

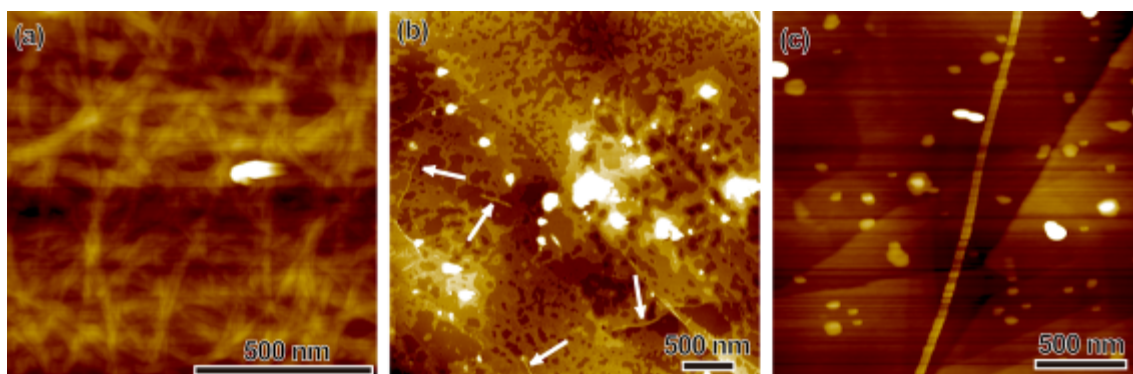

Figure S2 AFM images for the binary self-assembly of C18C and (a) malonic acid, (b) succinic acid, and (c) glutaric acid. The arrows in (b) indicate fiber structures.

### pH Titration

For the pH titration of C18C, aqueous solution (2 ml) was prepared by addition of degassed distilled water to C18C and subsequent sonication at  $25 \text{ }^{\circ}\text{C}$ . The resultant aqueous solution (10 mM) was then titrated with 0.1 N NaOH. The pH titration was carried out using an MP225 pH meter (Mettler Toledo).
